# Supplementary material for: Comparison of visual diagnostic accuracy of dermatologists practicing in Germany in patients with light skin and skin of color
Source: PubMed Central journal article supplement (PMC11021442; doi:10.1038/s41598-024-59426-4), 2024-04-16
Supplement: 41598_2024_59426_MOESM1_ESM.pdf [file 41598_2024_59426_MOESM1_ESM.pdf]

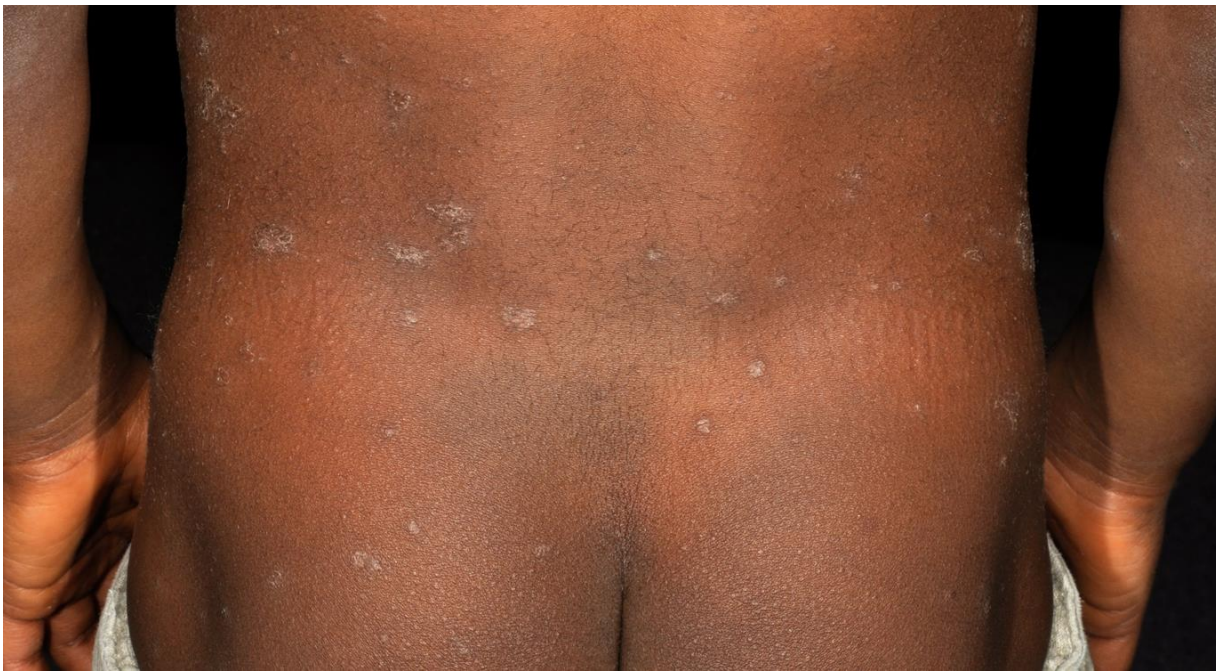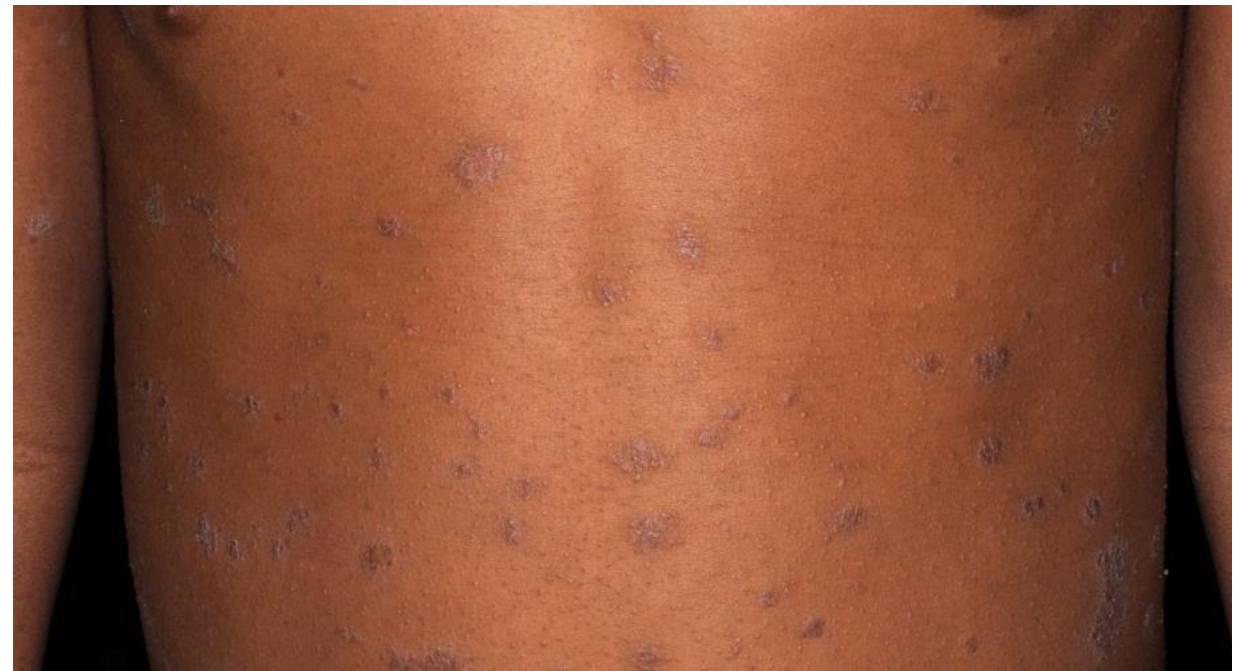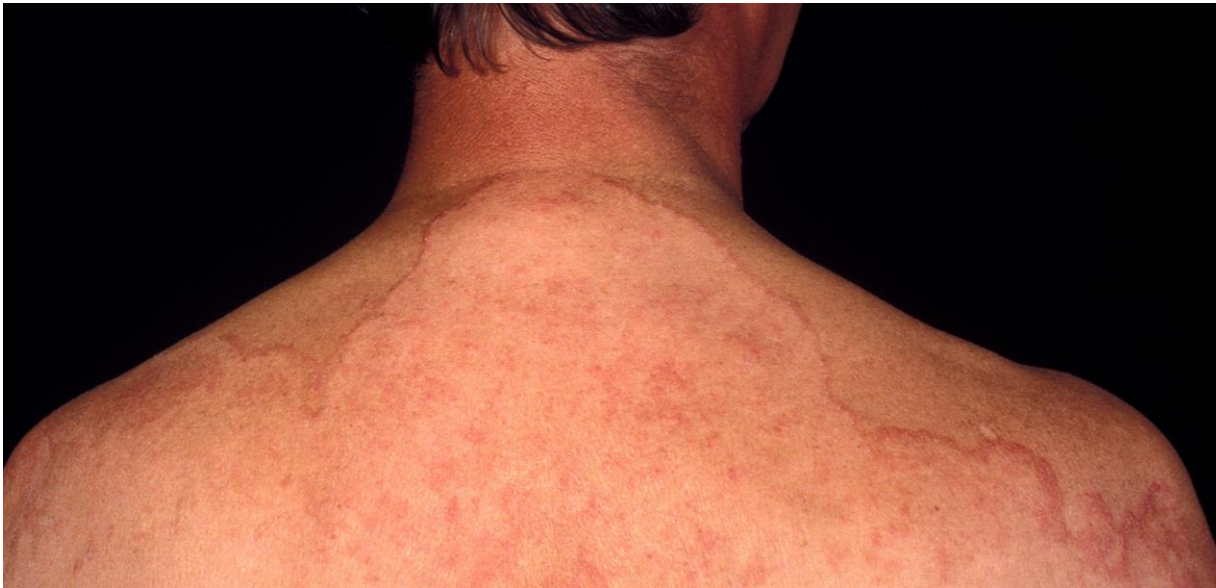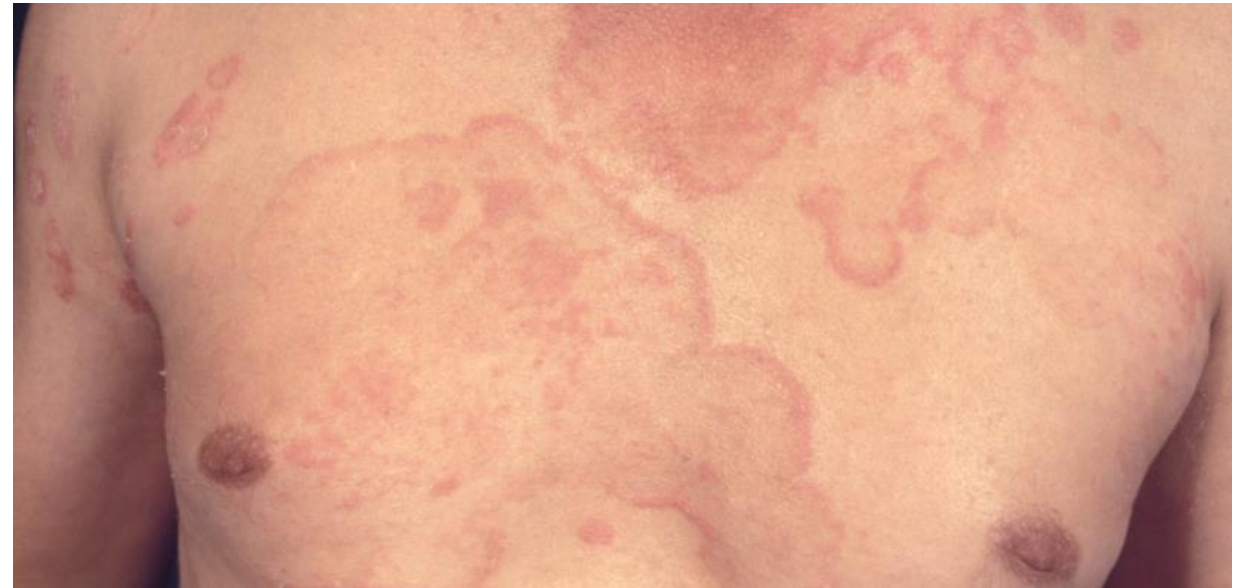

Correct answers: Tinea corporis, mycosis



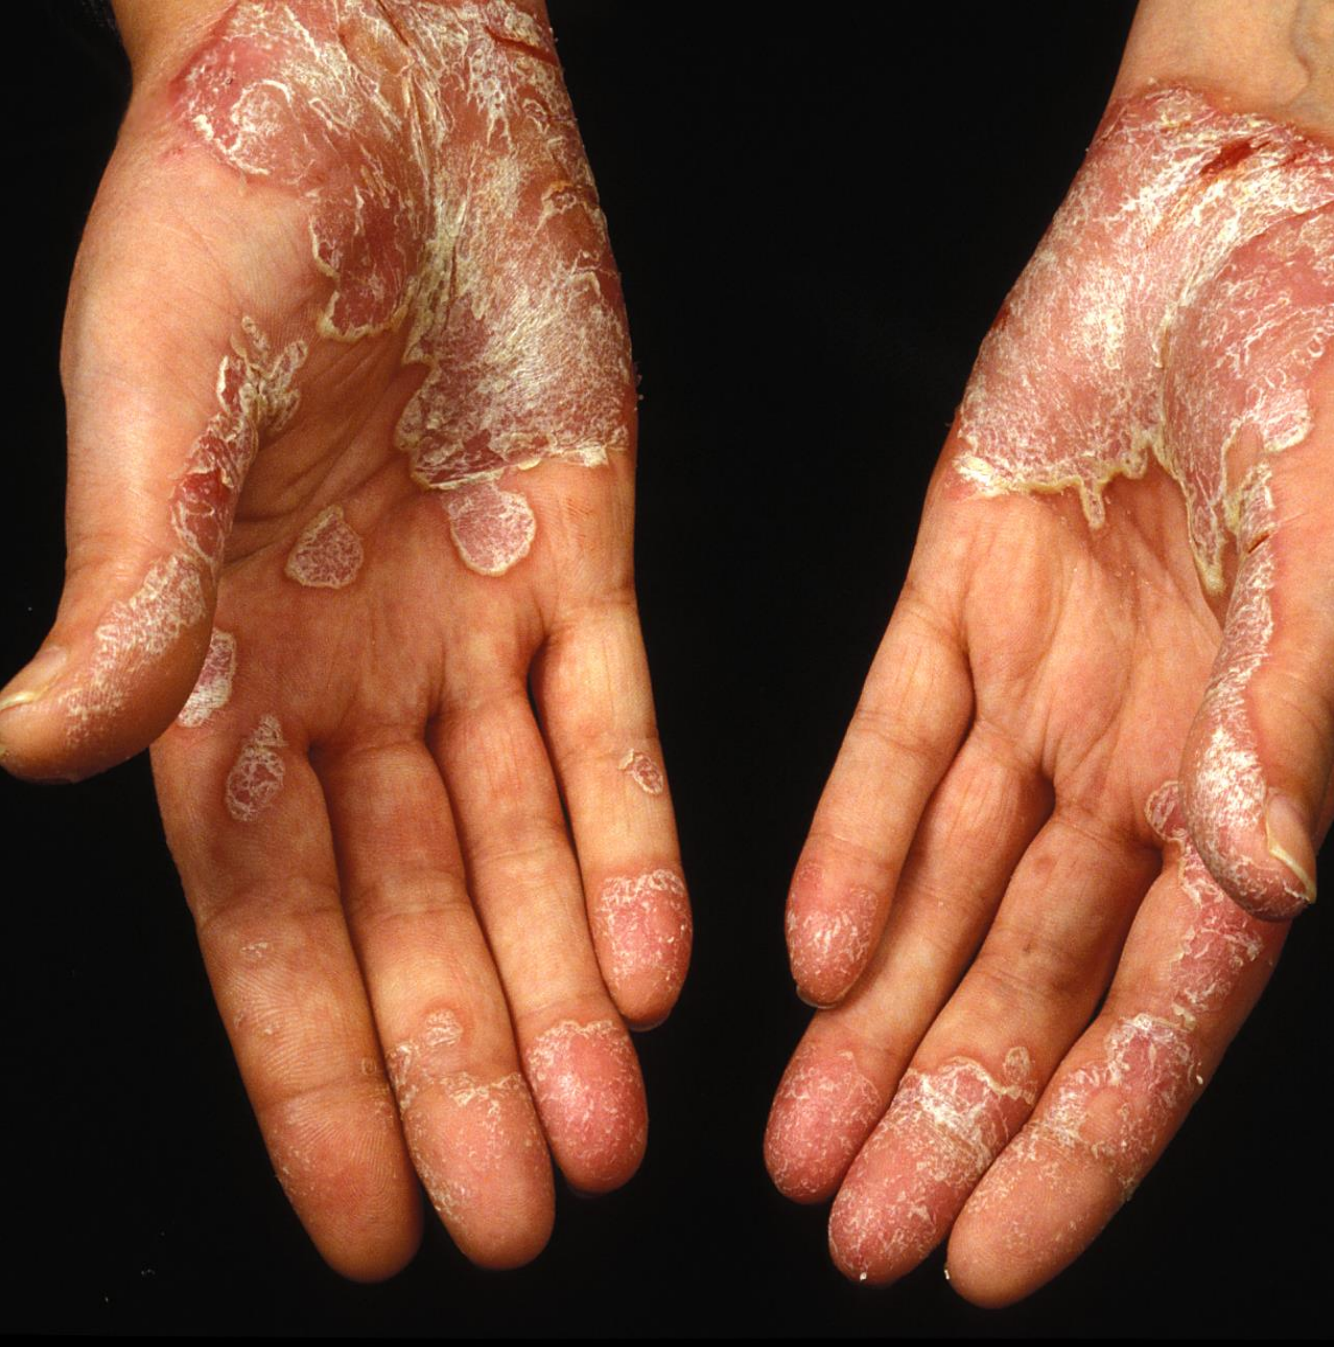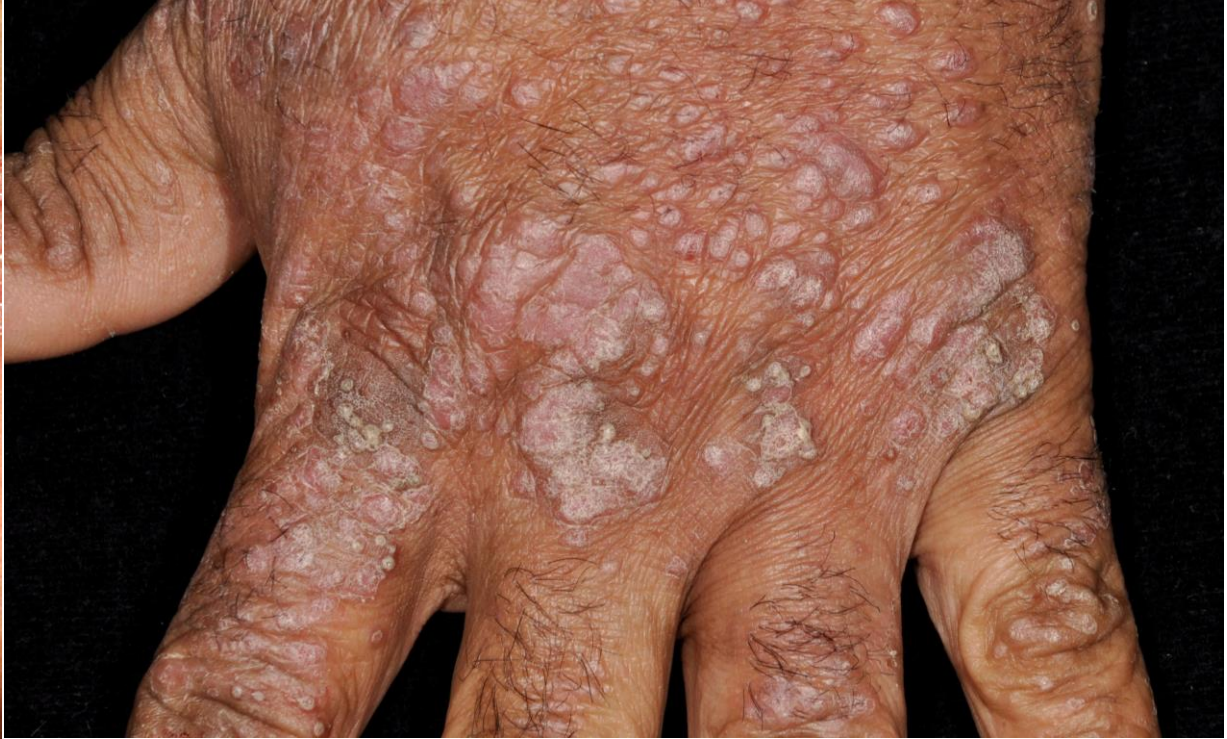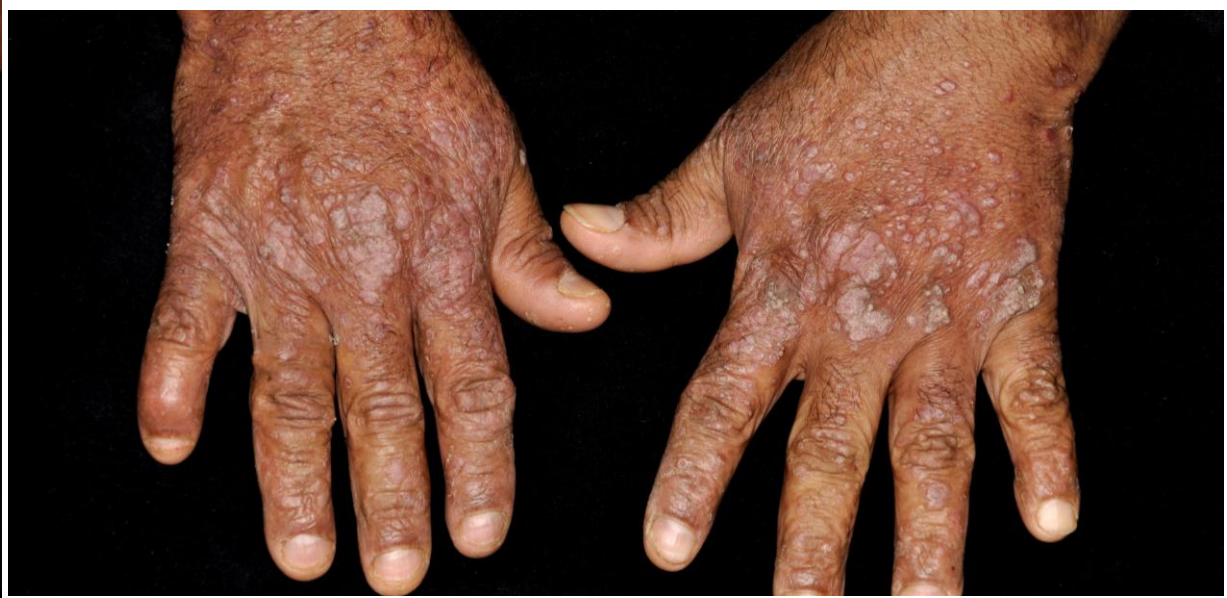

Correct answer: Psoriasis



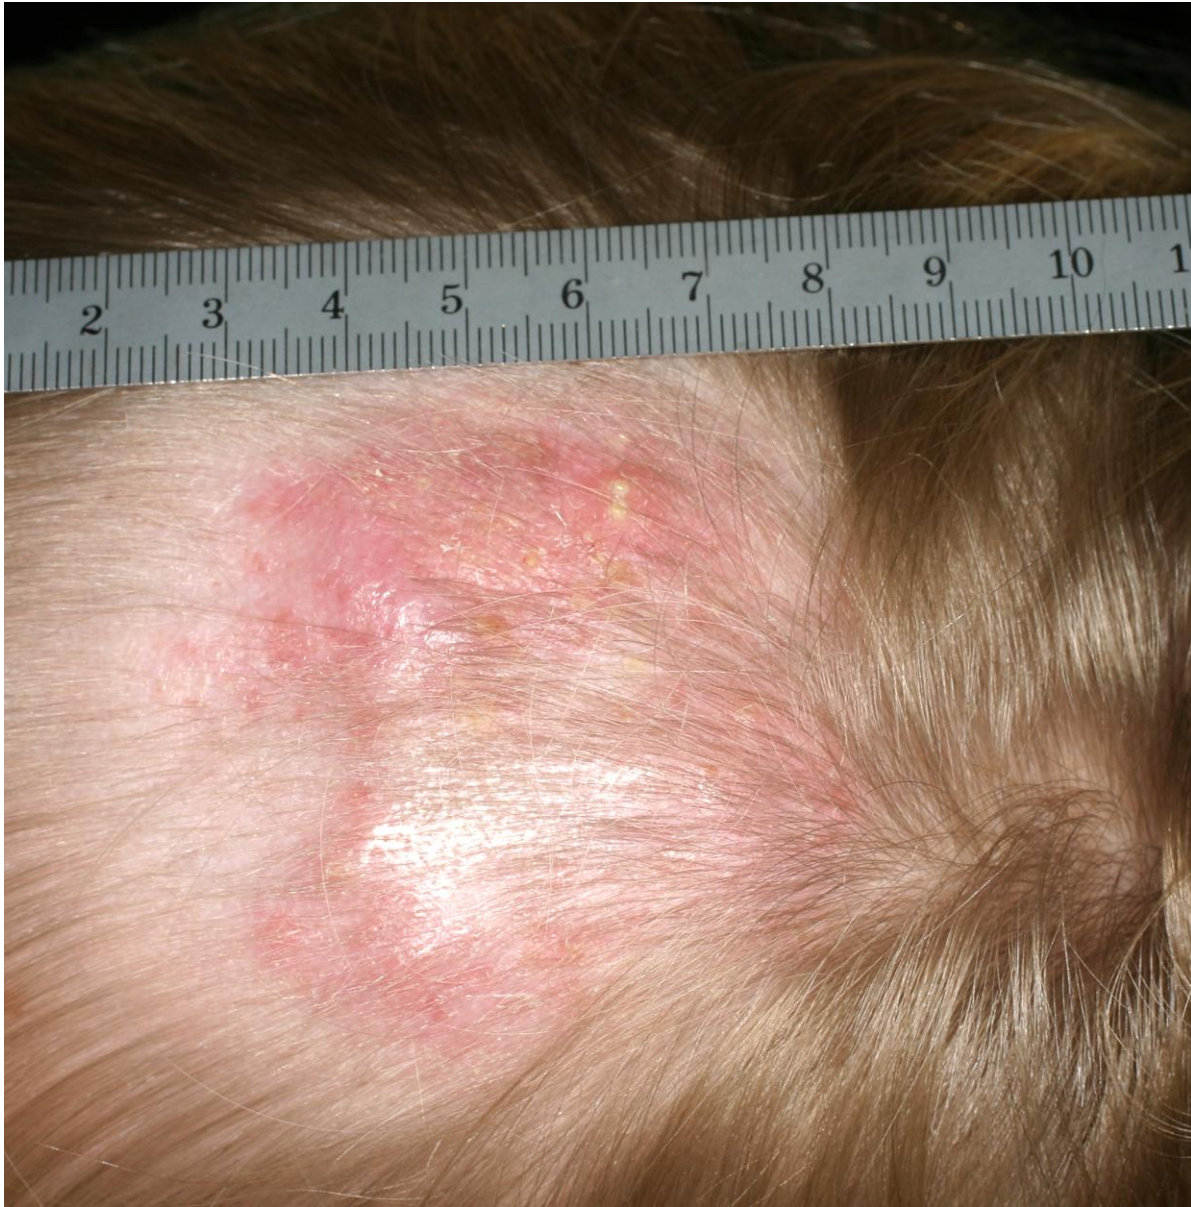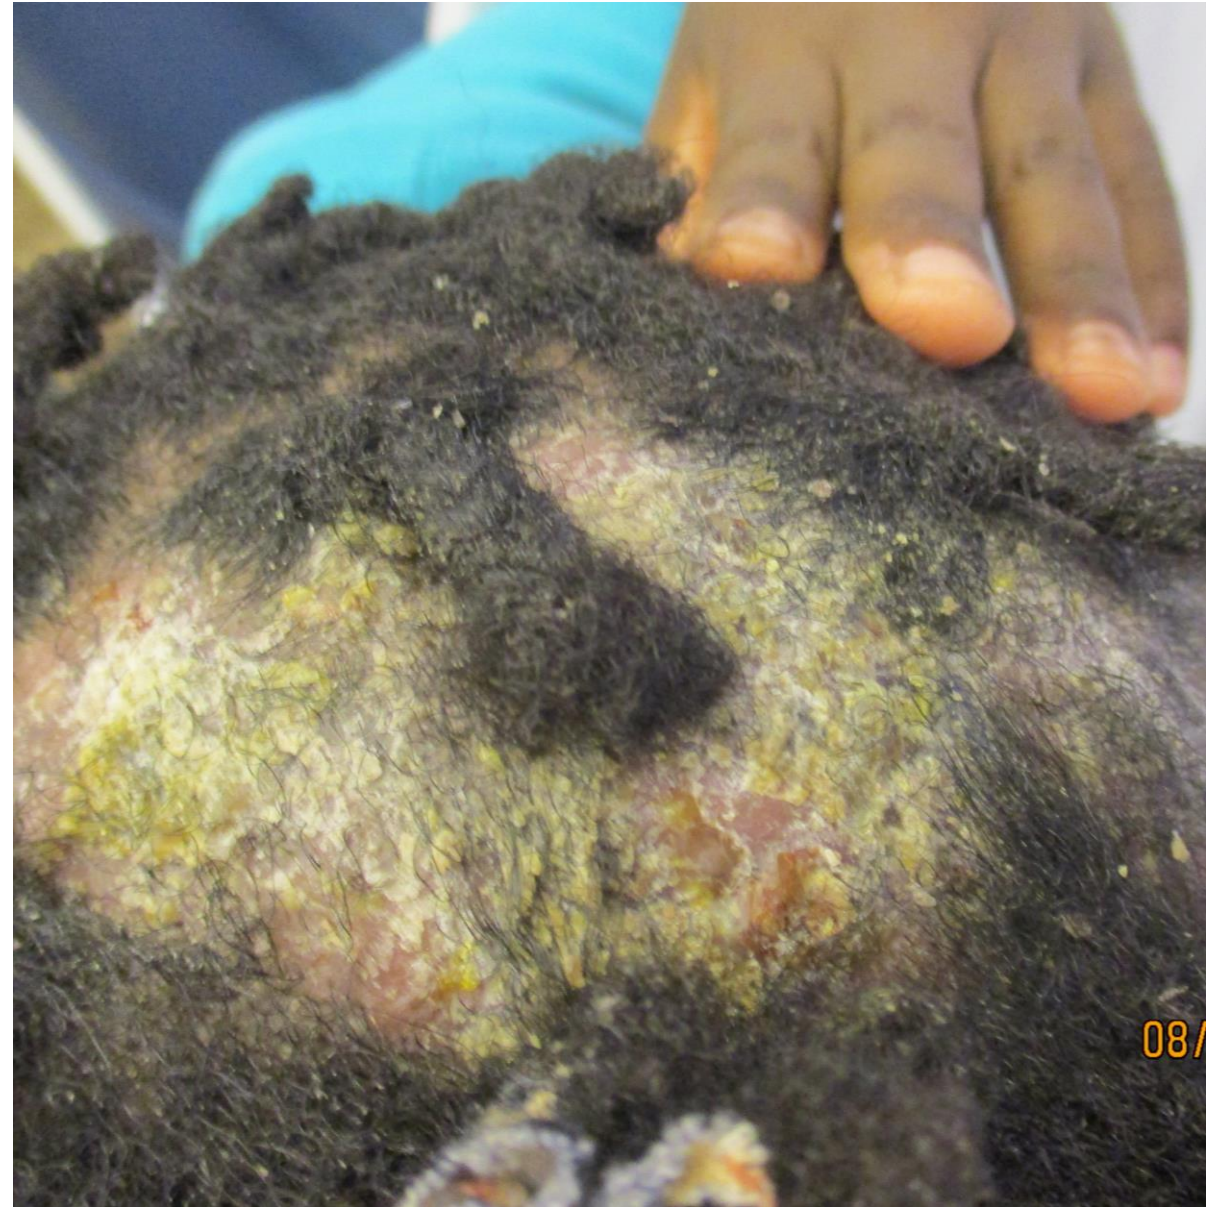

Correct answers: Tinea capitis, kerion celsi, trichophytia, flavus, mycosis



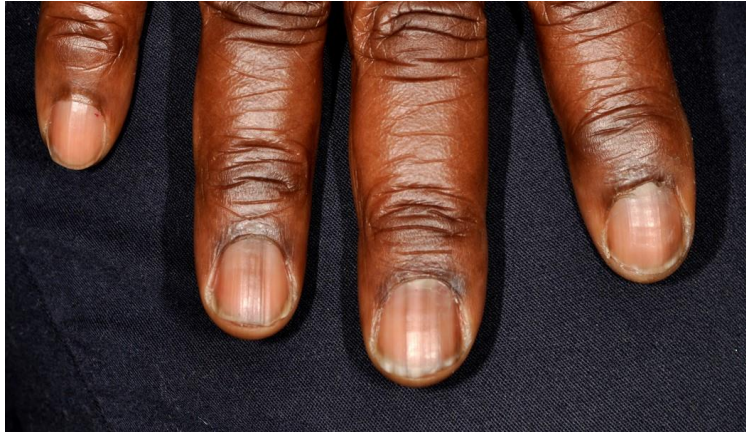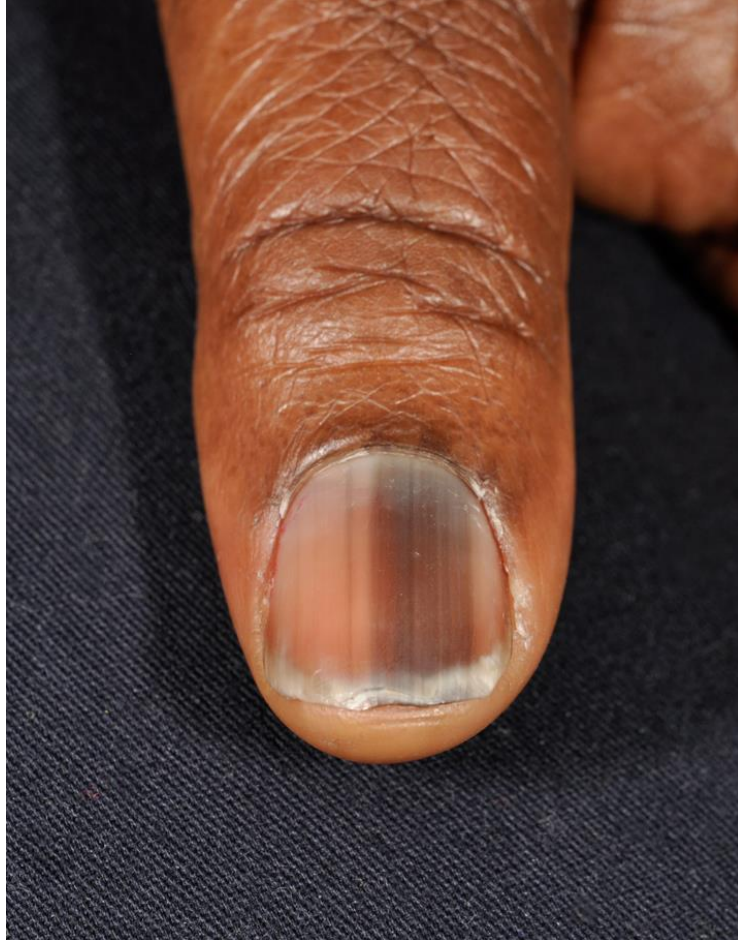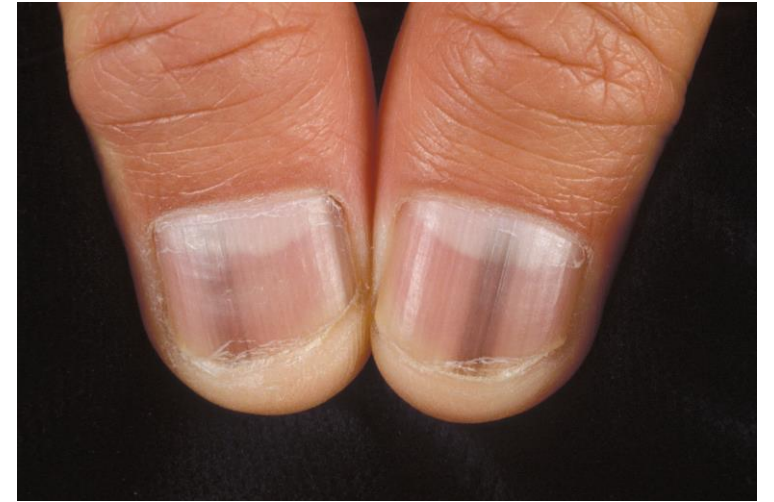

Correct answers: Melanonychia, naevus

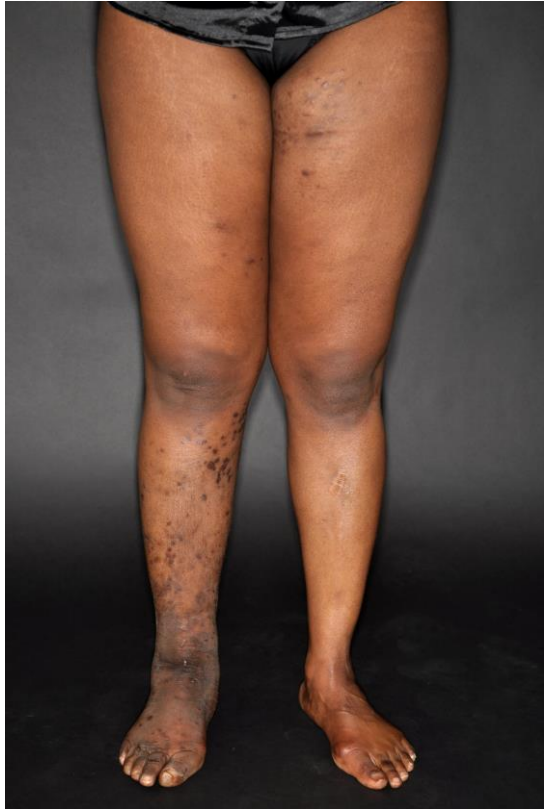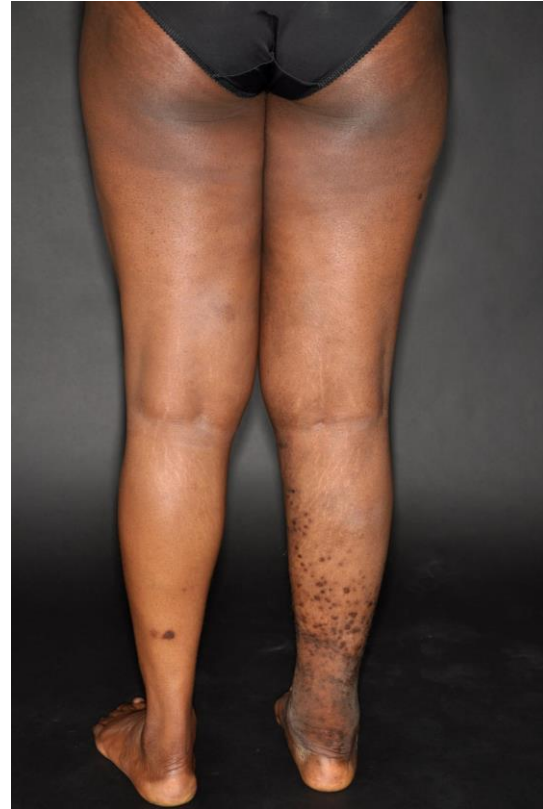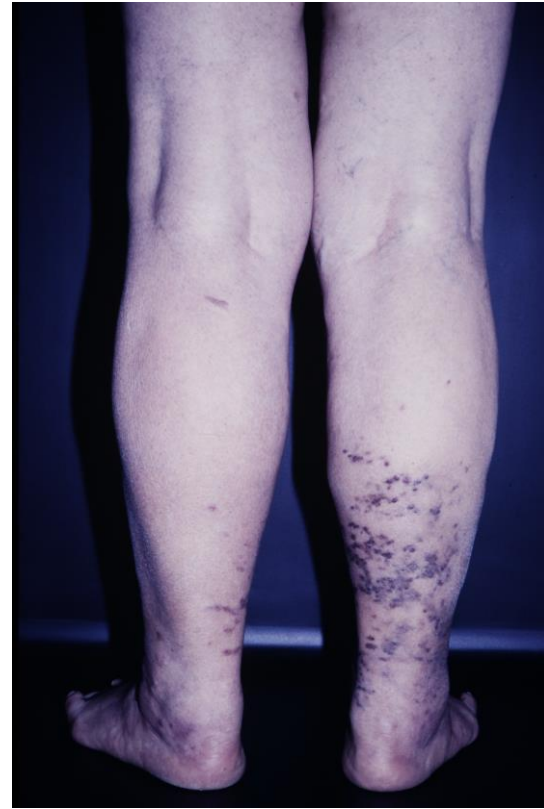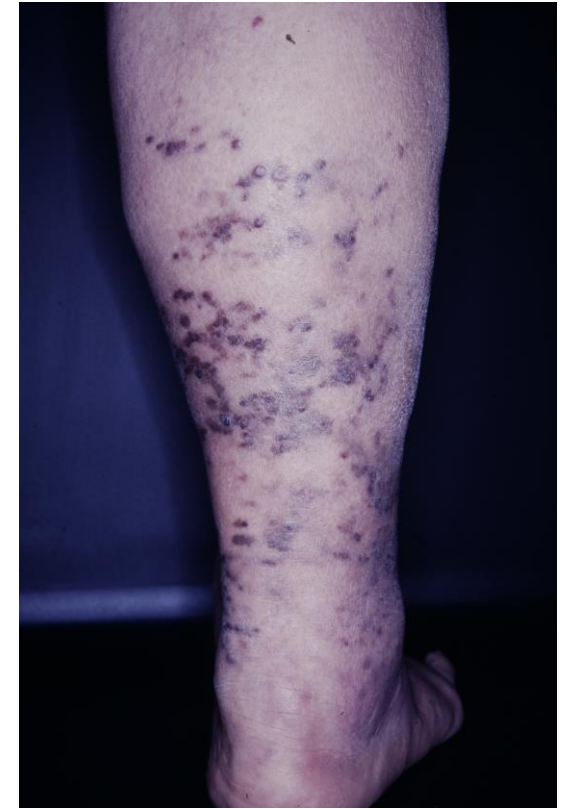

Correct answer: Kaposi sarcoma



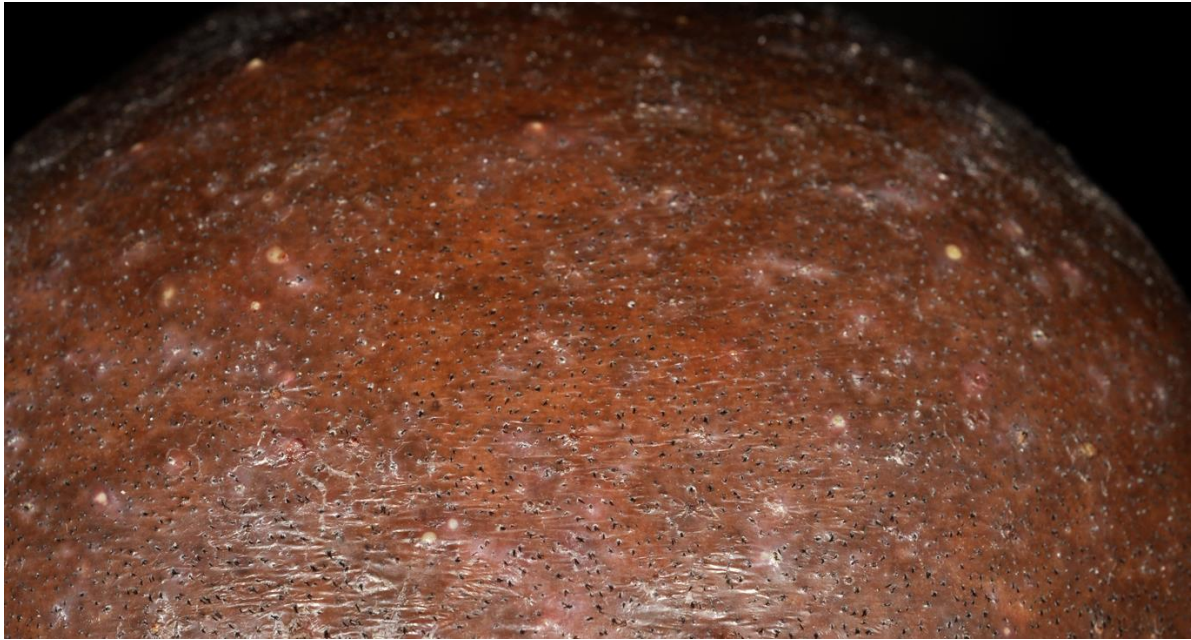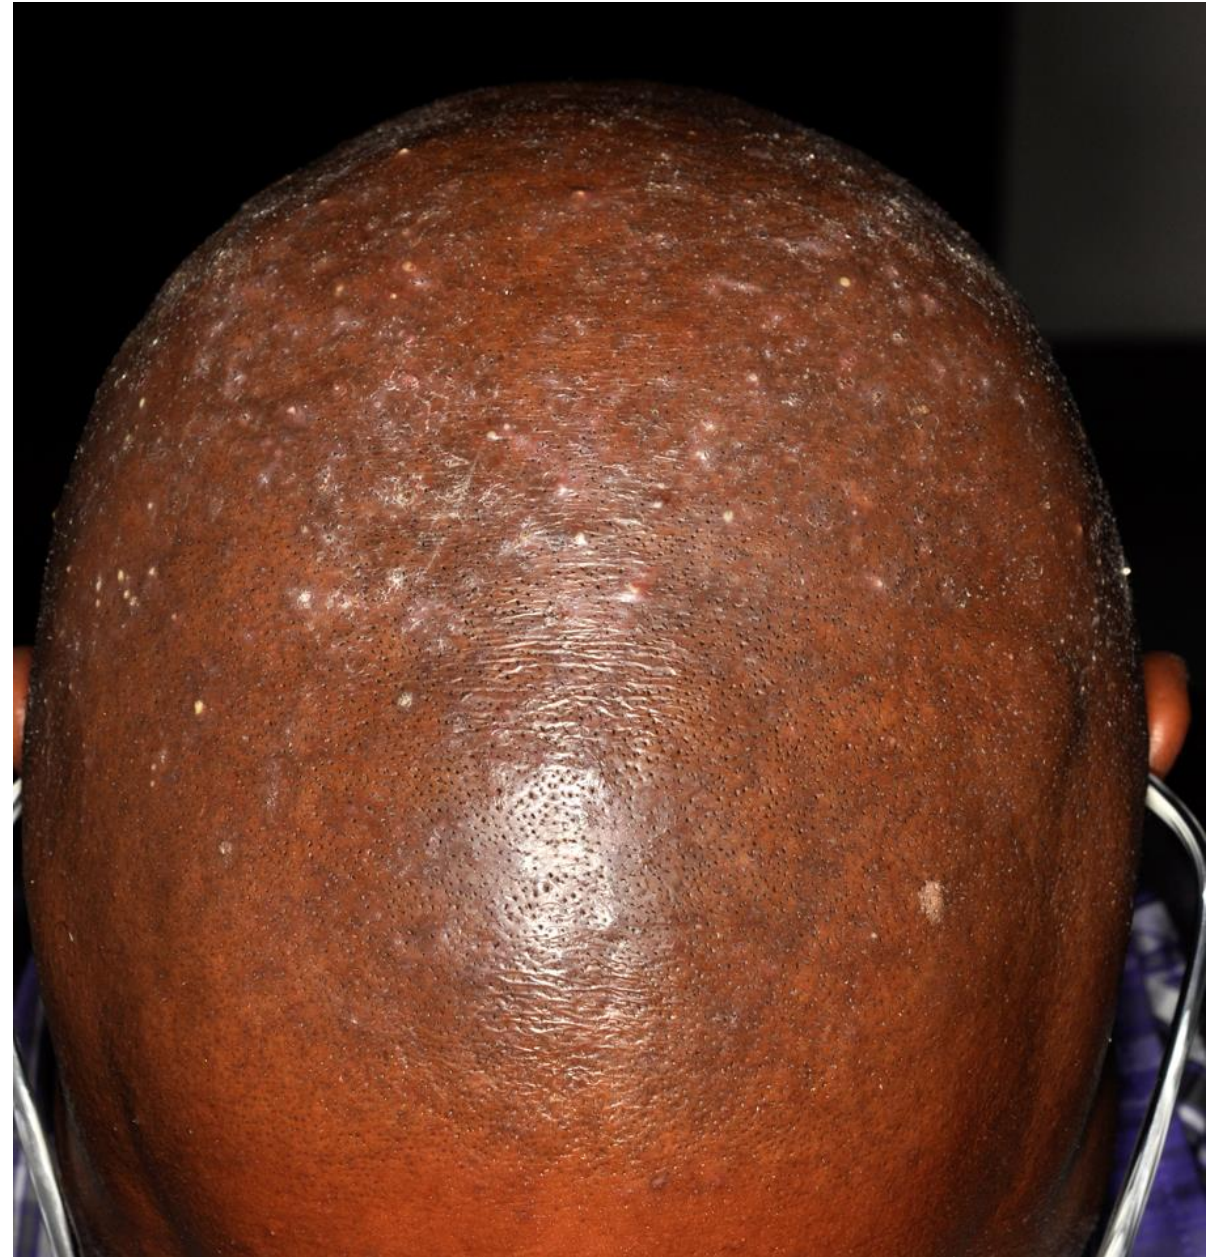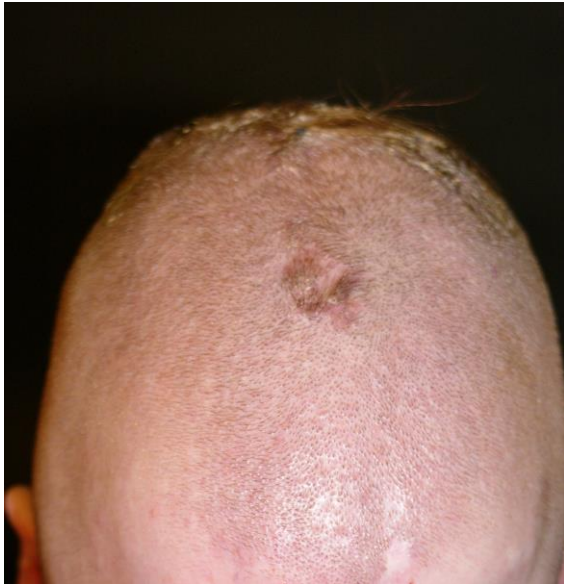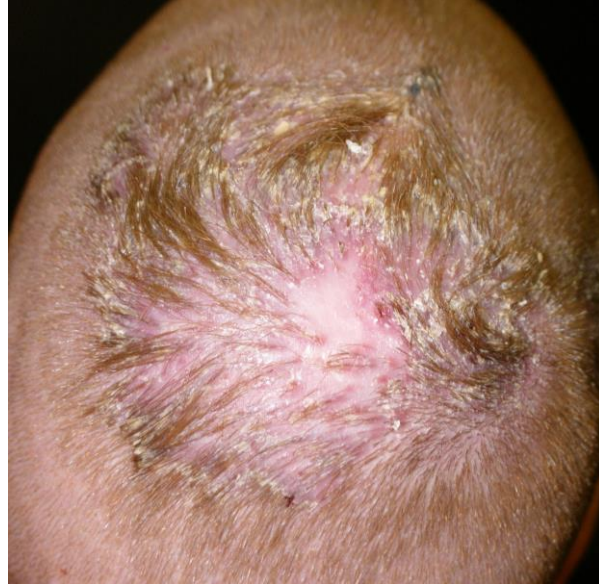

Correct answers: Folliculitis decalvans



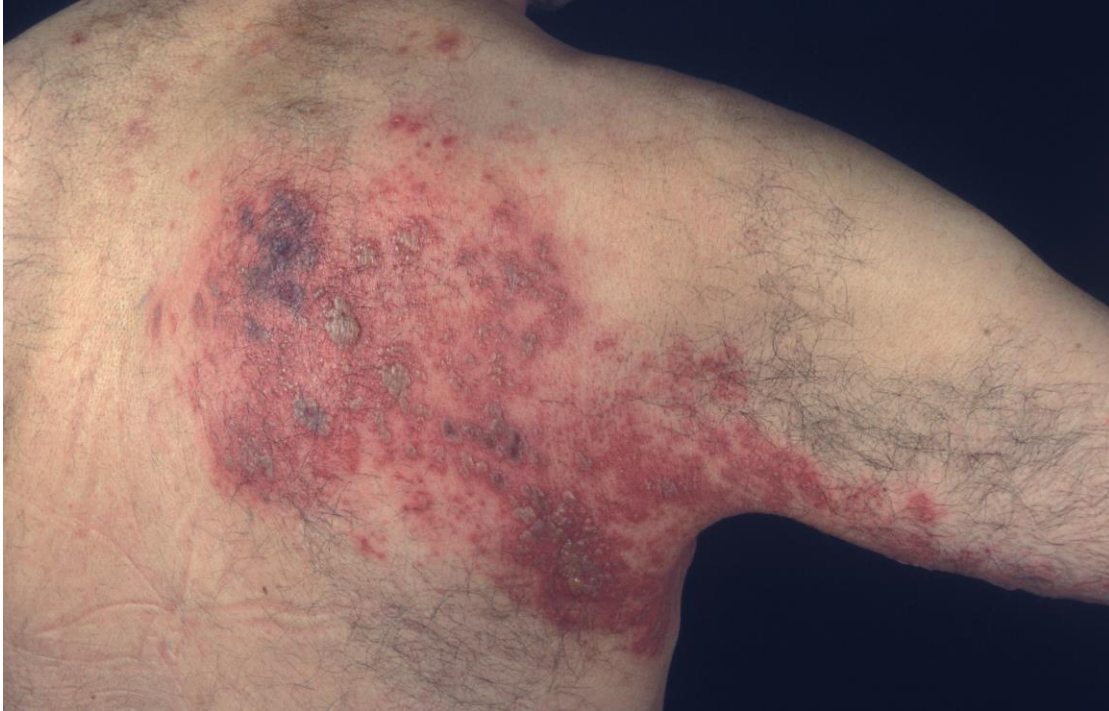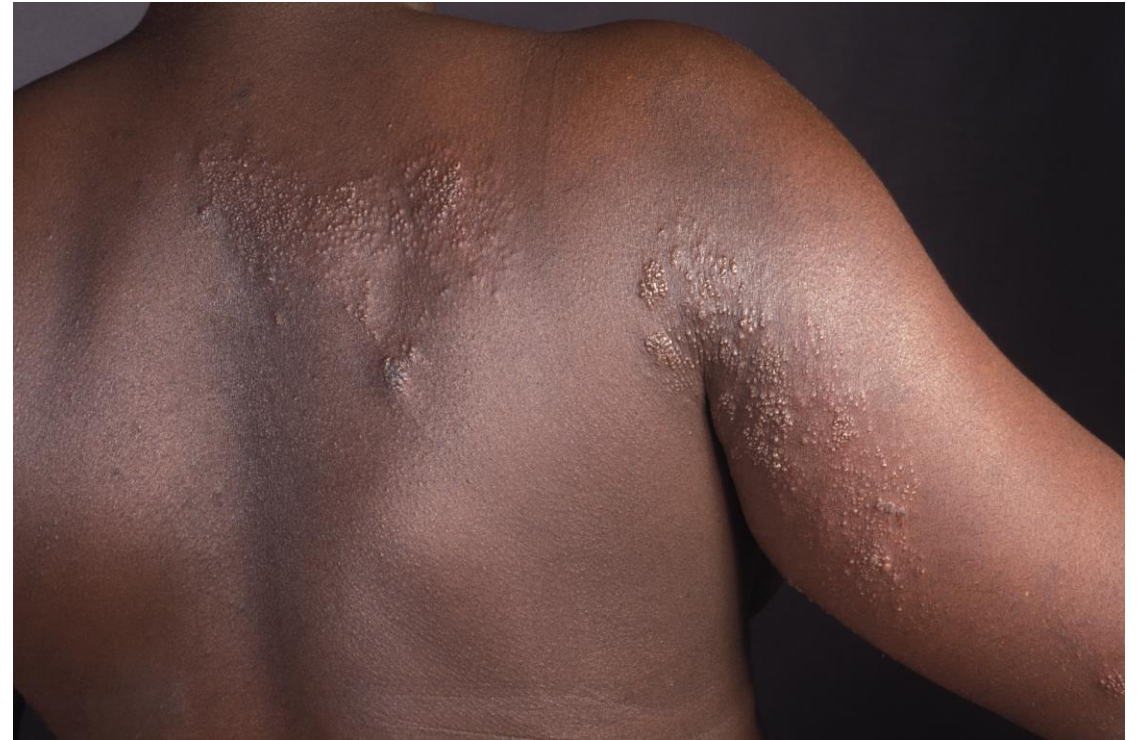

Correct answers: Herpes zoster



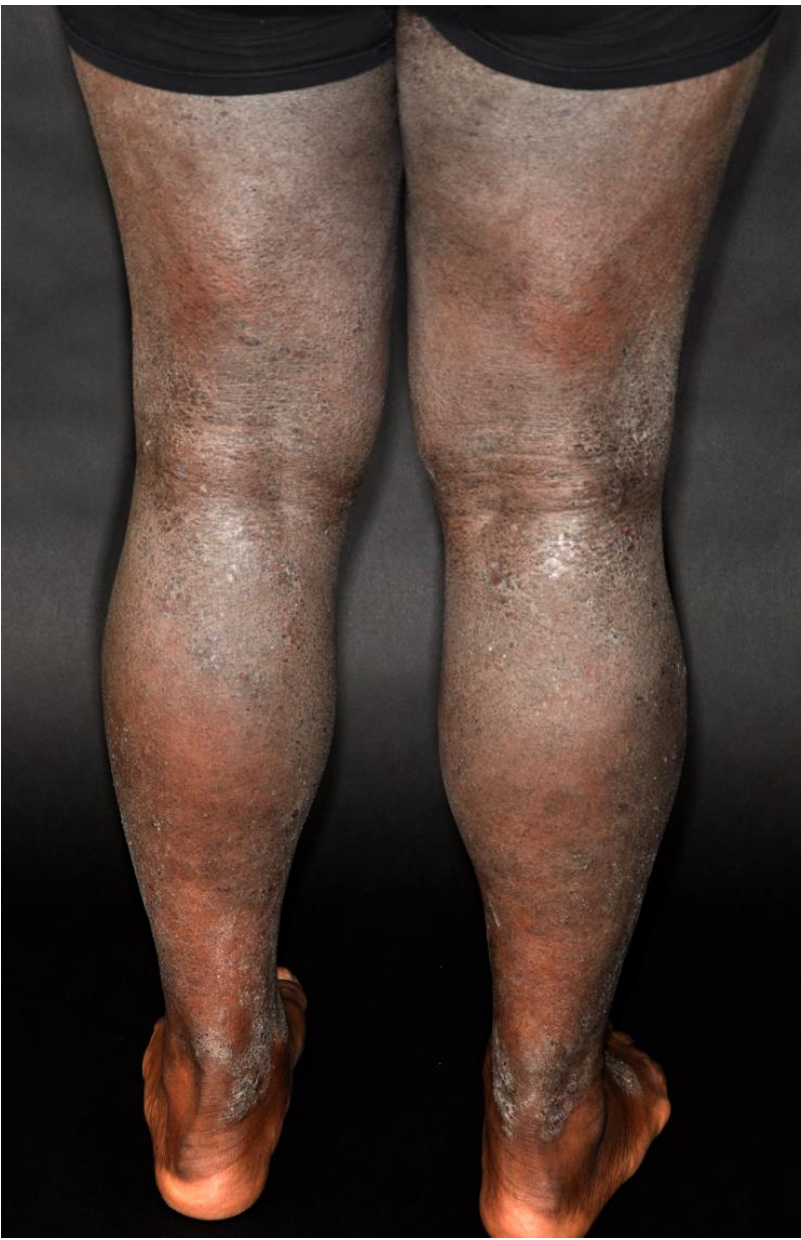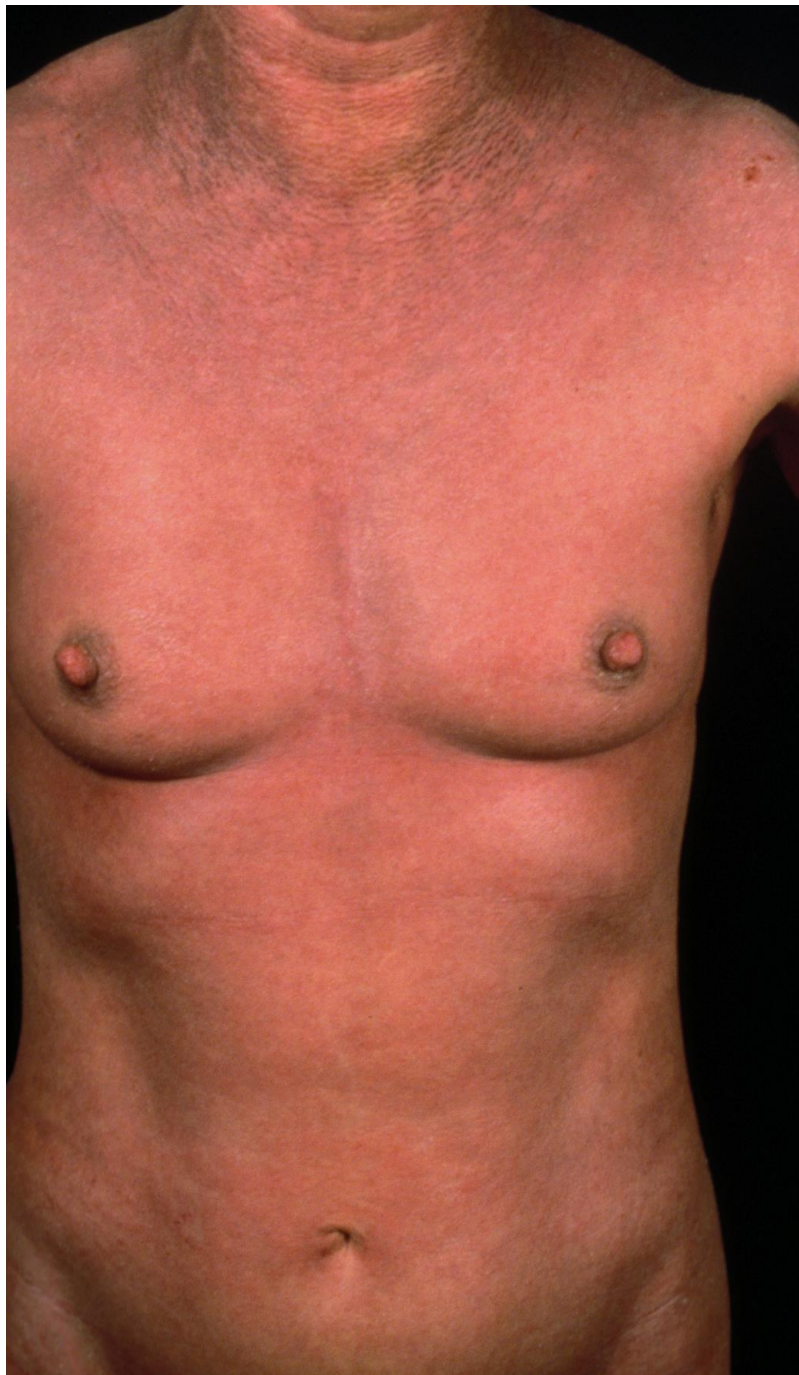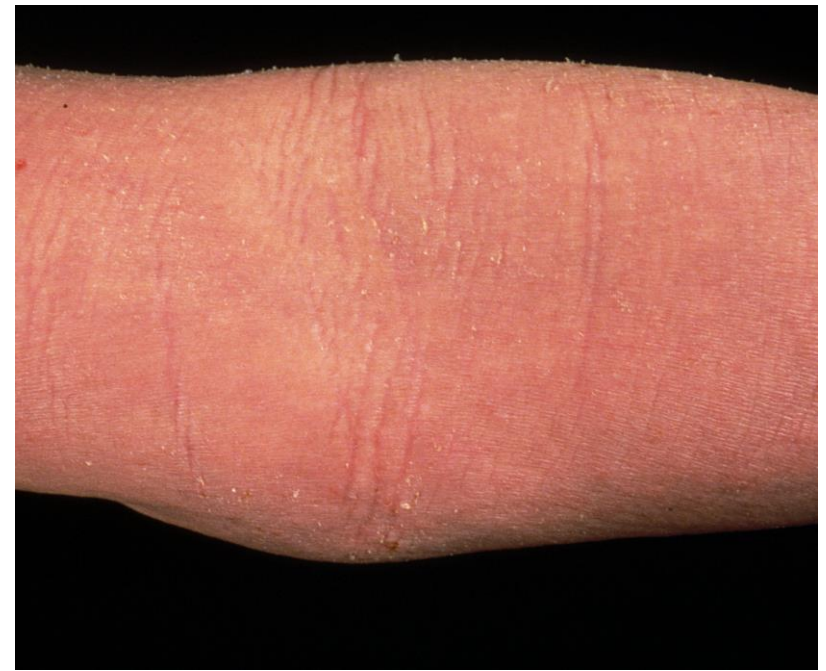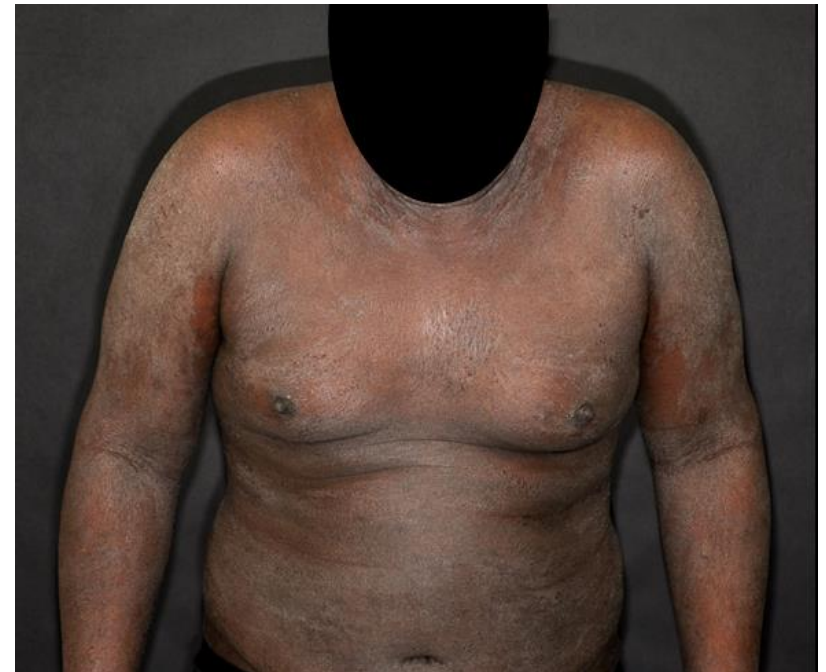

Correct answers: Atopic dermatitis



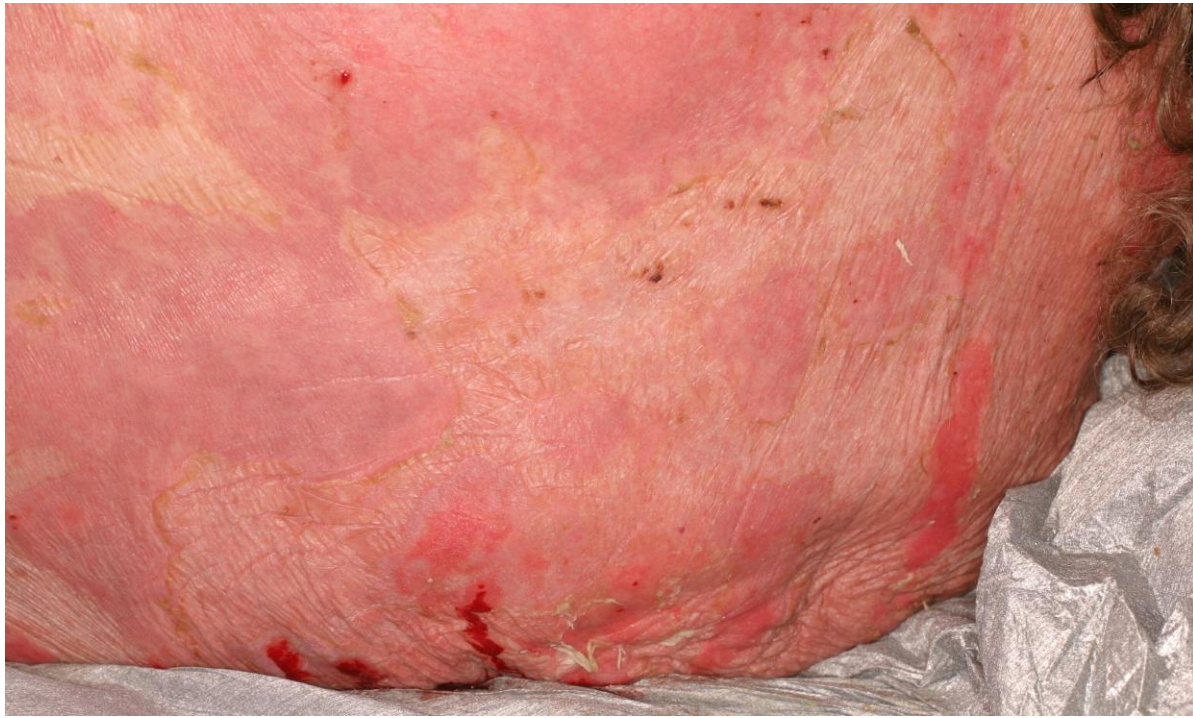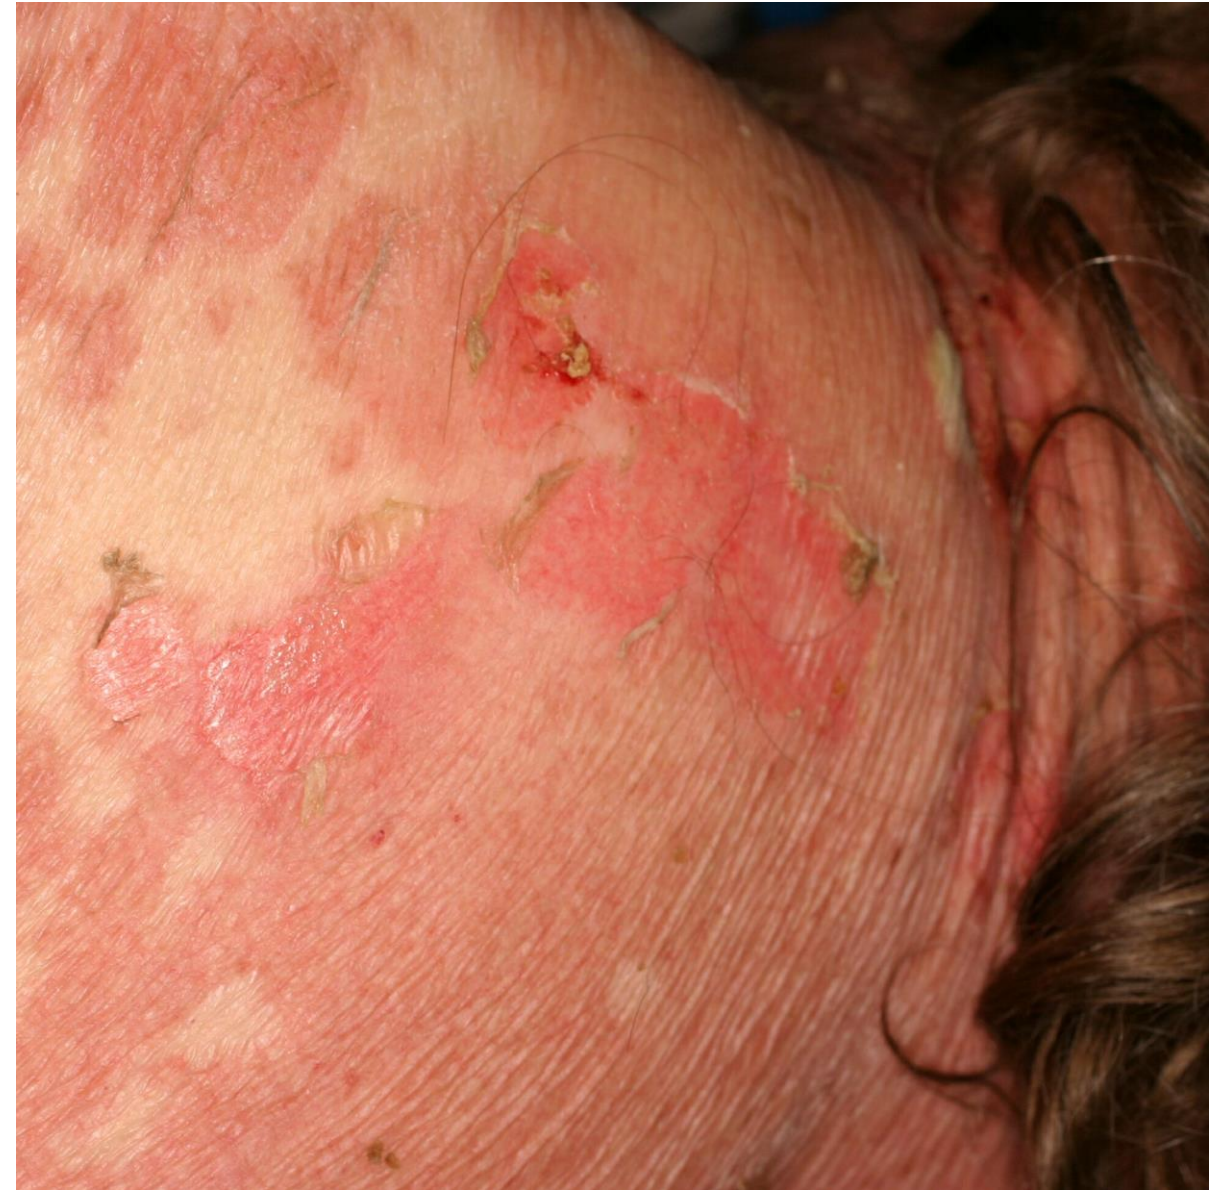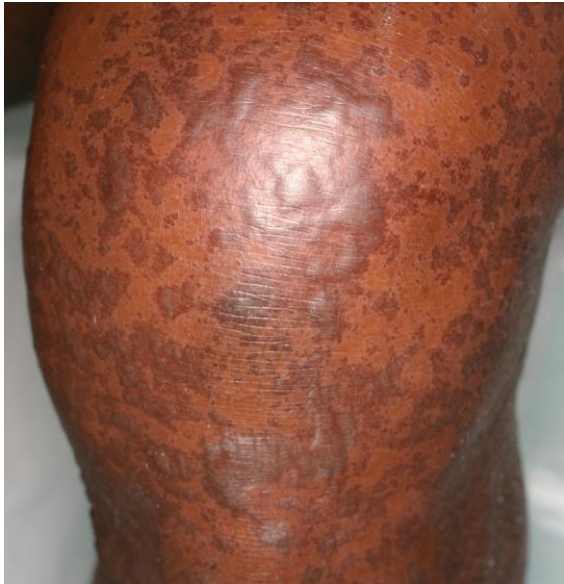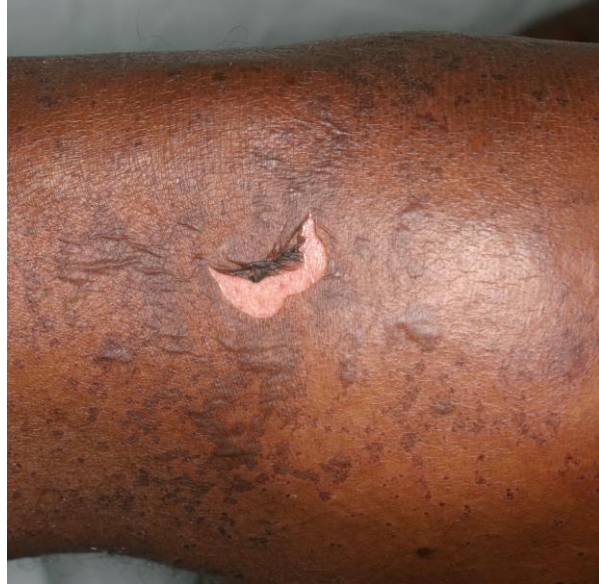

Correct answers: Steven-Johnson-syndrome, toxic epidermal necrolysis



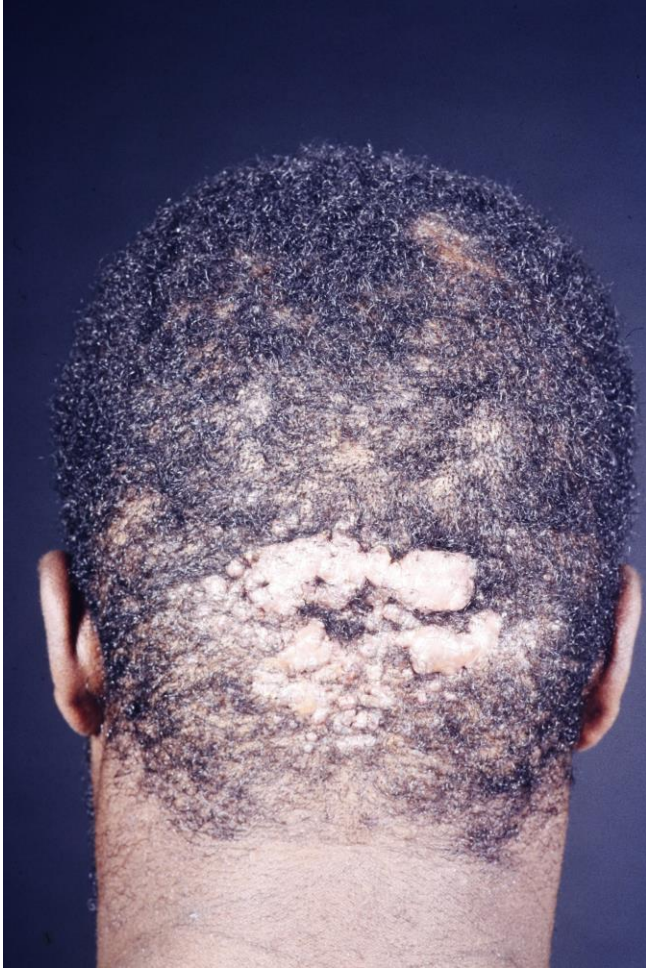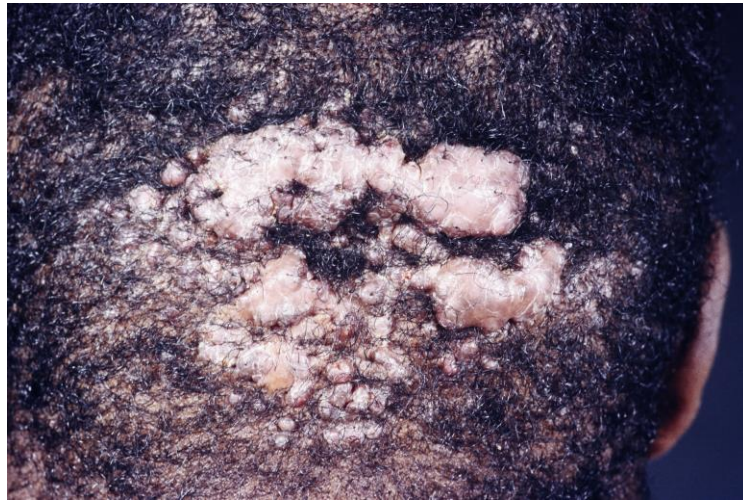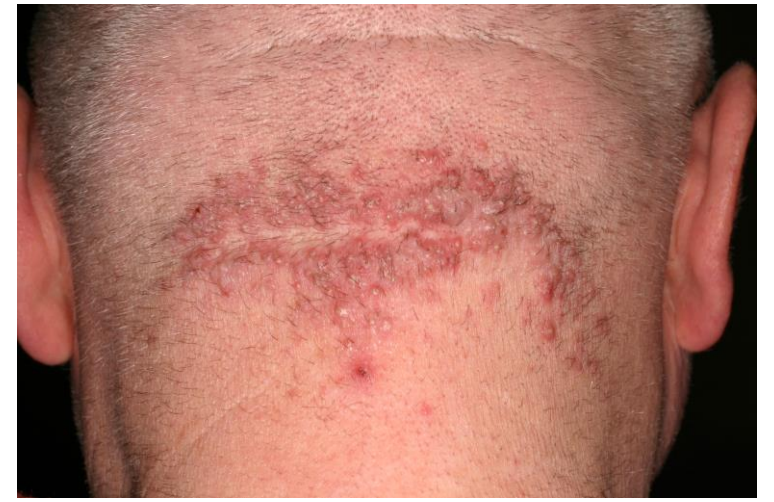

Correct answers: Acne keloidalis nuchae, Folliculitis sclerotisans nuchae



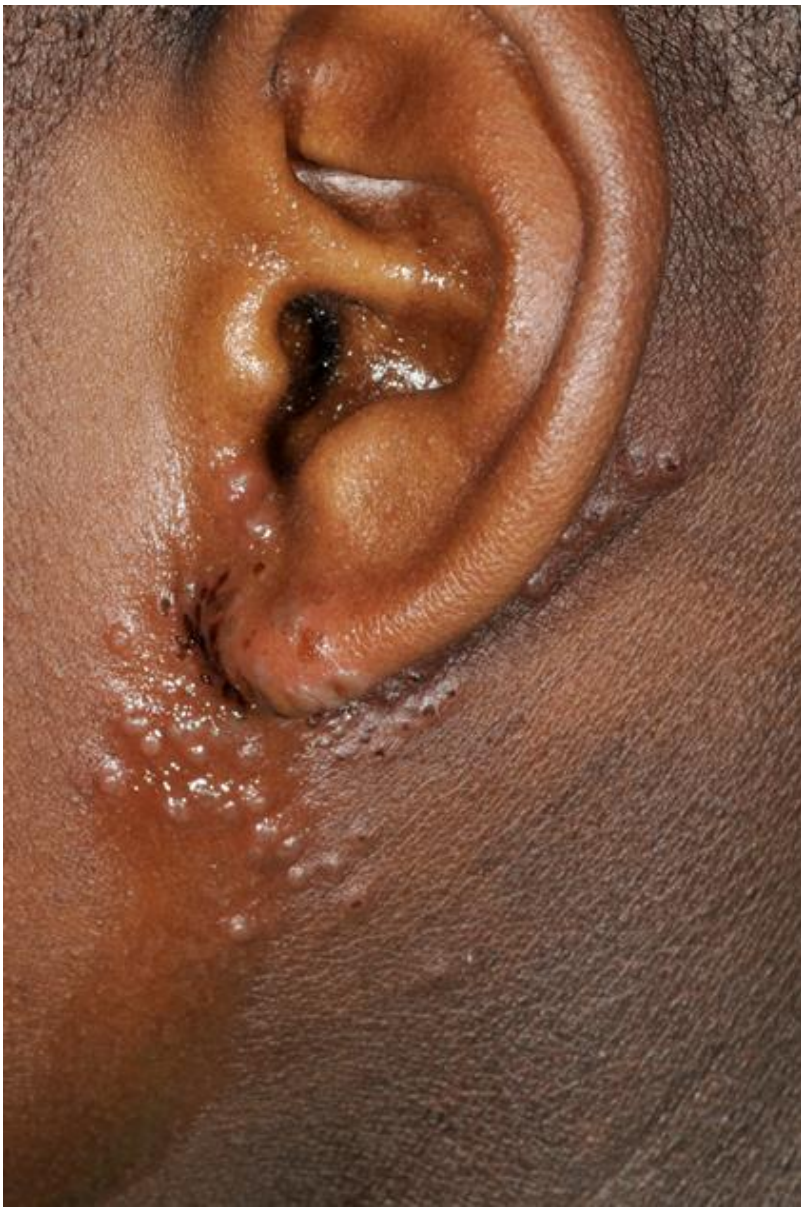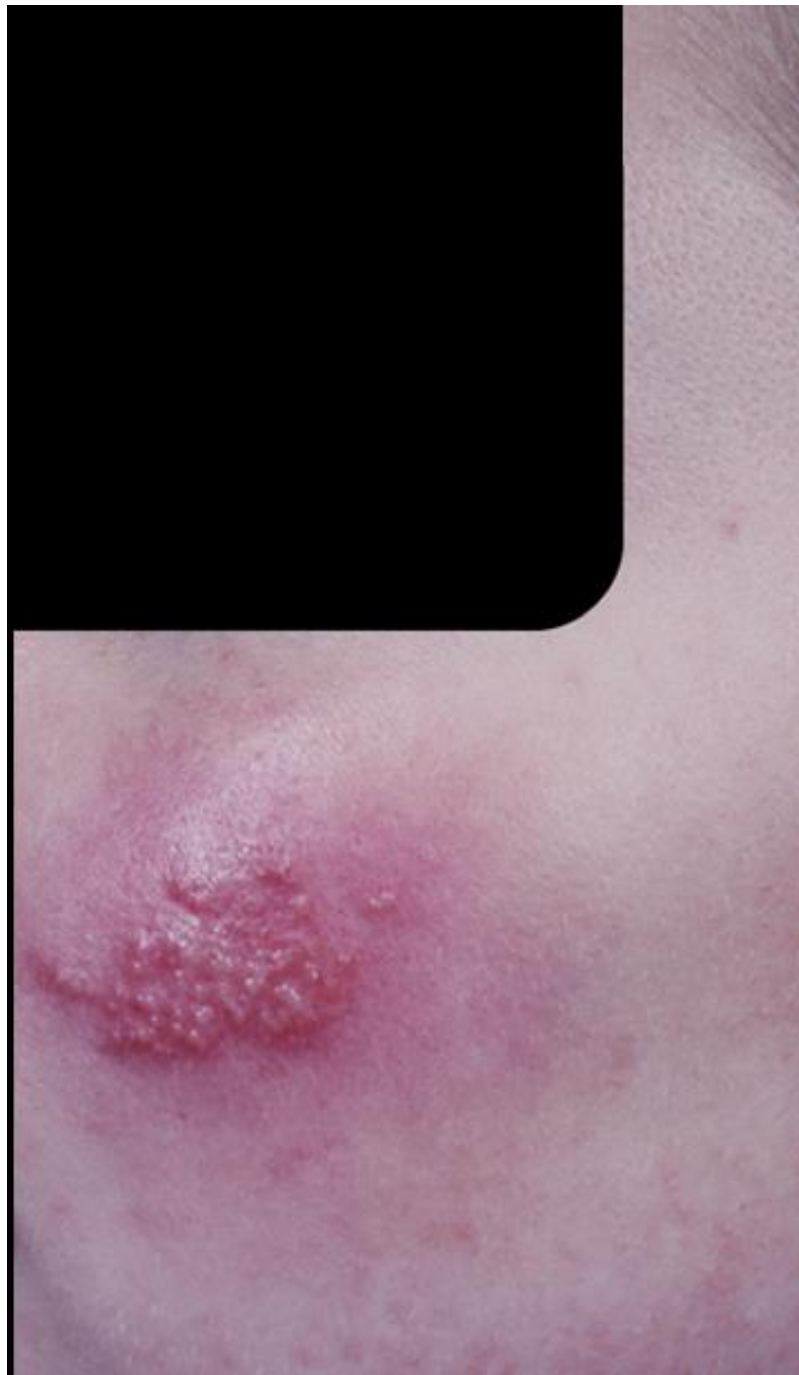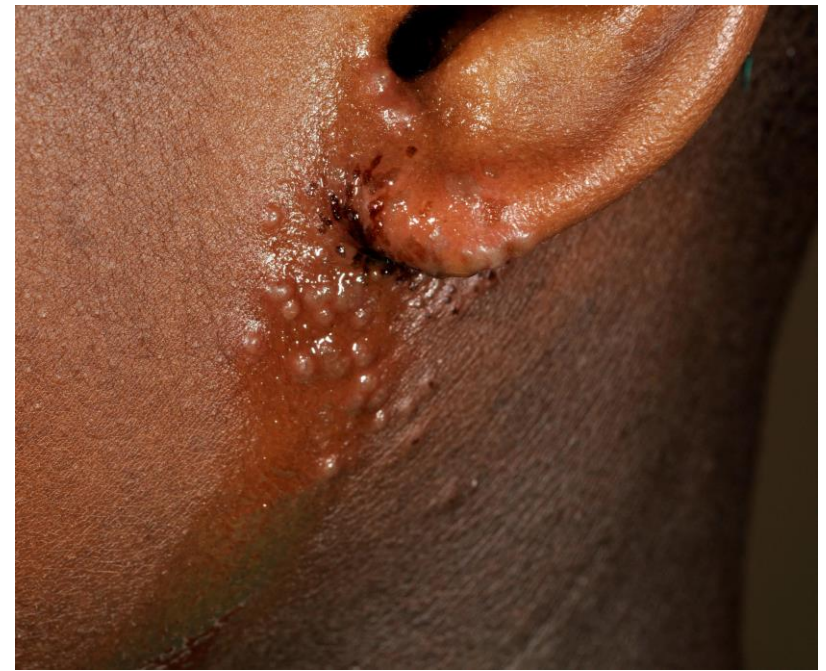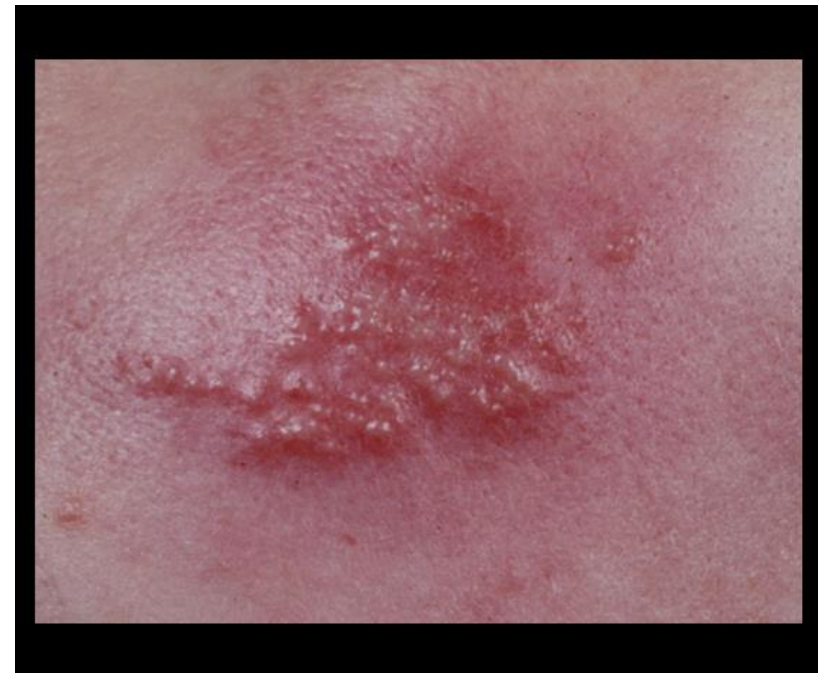

Correct answers: Herpes simplex



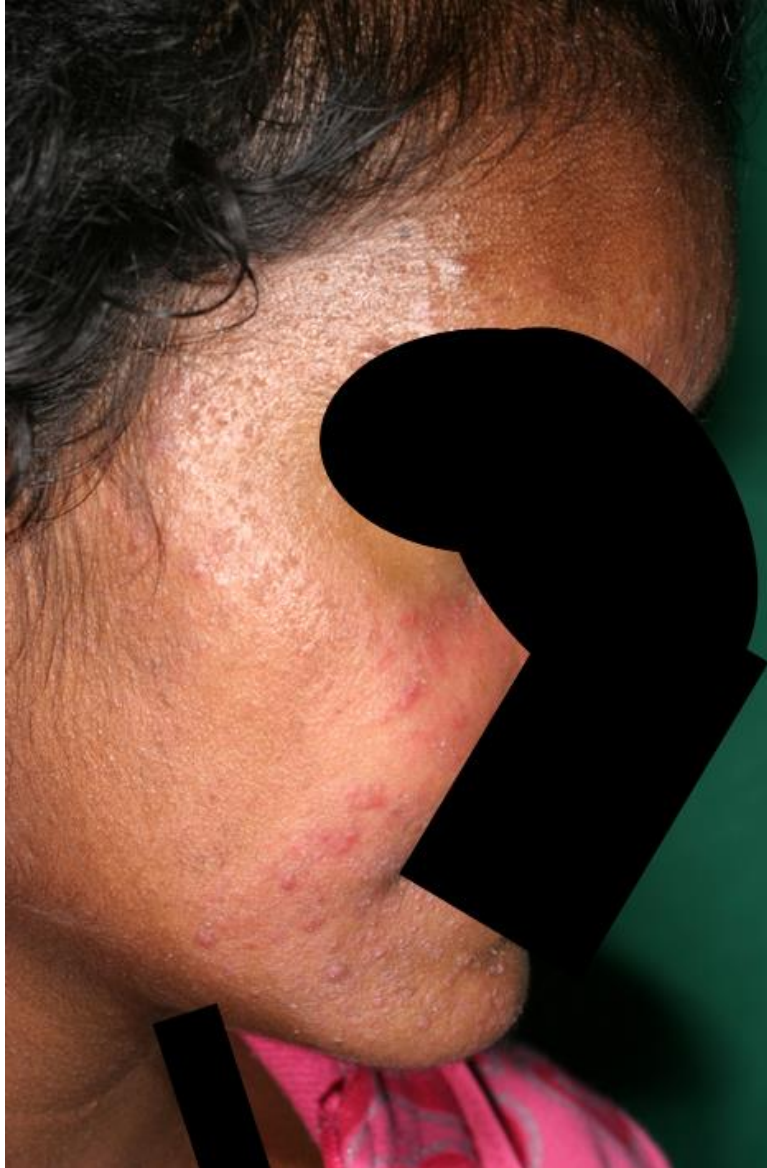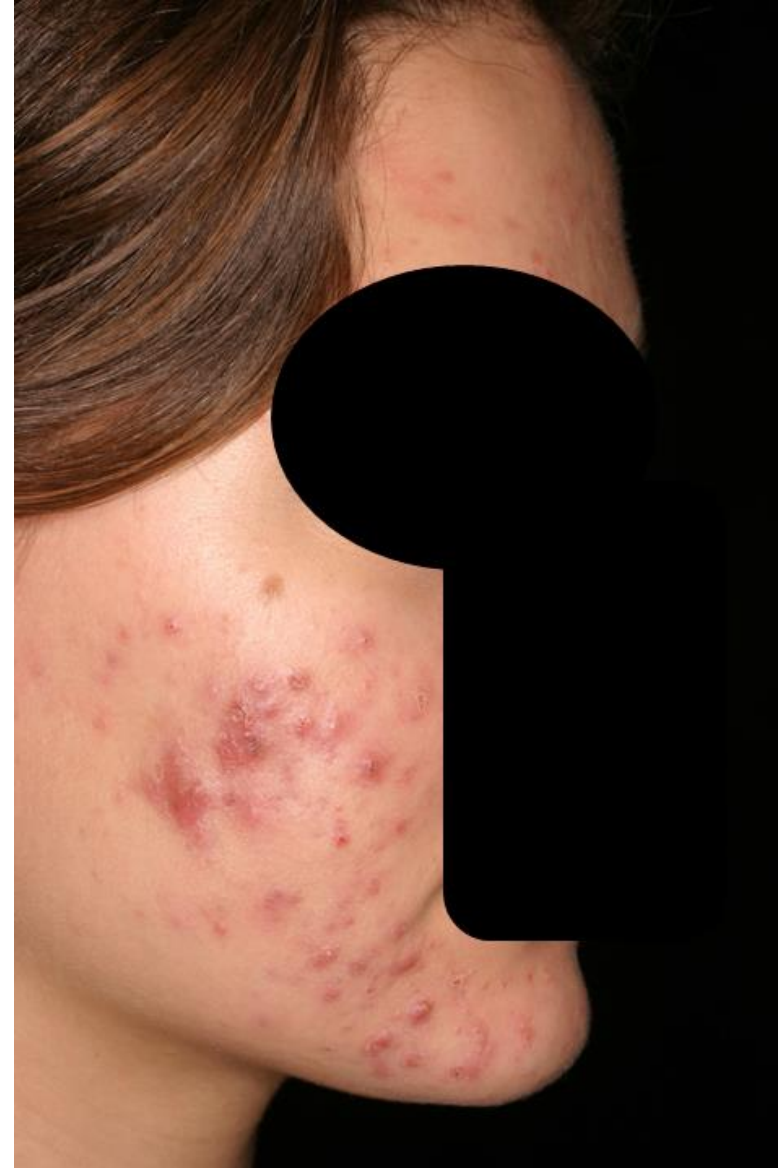

Correct answer: Acne
